# Supplementary material for: DNA Methylation Is Involved in the Expression of miR-142-3p in Fibroblasts and Induced Pluripotent Stem Cells
Source: Hindawi journal article supplement (doi:10.1155/2014/101349), 2014-01-01
Supplement: f1 [file 101349.f1.pdf]

Supplemental Figure 1 Siti et al.

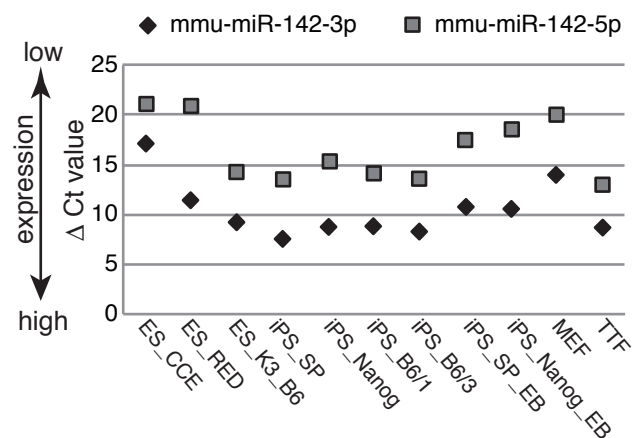

**Expression of miR142-5p and miR-142-3p**

Expression level of miR142-5p and miR142-3p was originally examined by microRNA array and published in Siti et al., Plos One, 2013. Results of miR-142-5p and miR142-3p were extracted from Table S4 of Siti et al.  $\Delta$ Ct value was calculated by subtracting Ct values for mammalian U6 snRNA, which was selected as an internal control, from Ct value of each sample.

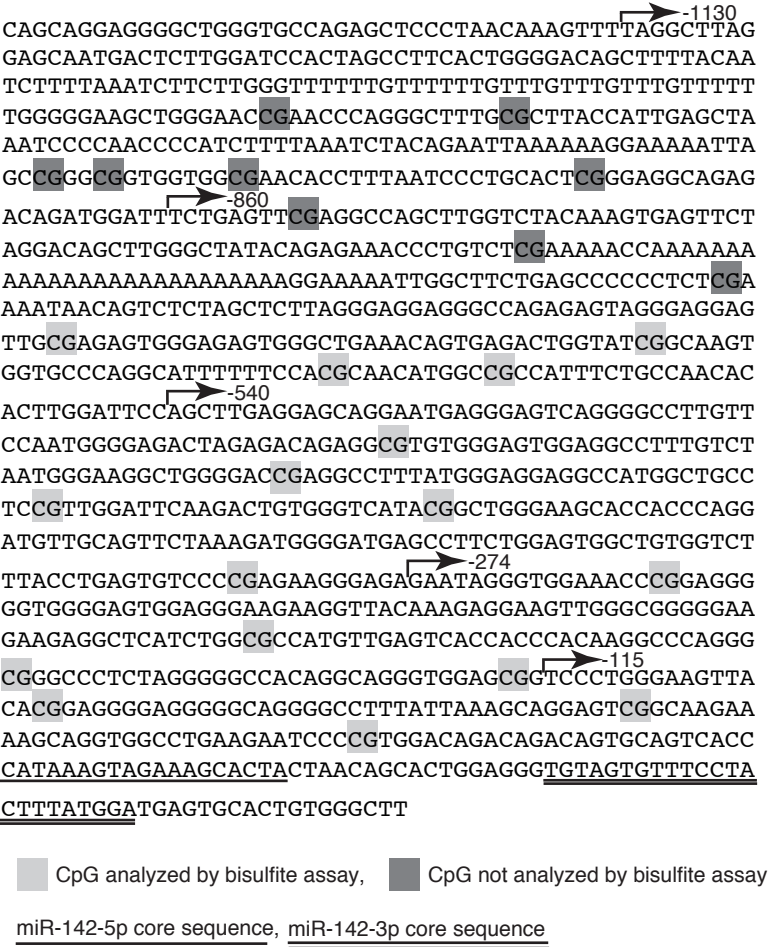

**Supplemental Fig. 1**  
5' up-stream genomic sequence of miR142  
Sequence of 5' genomic region of miR-142 retrieved from Ensemble ([http://asia/ensembl.org/Mus\\_musculus/Gene/](http://asia/ensembl.org/Mus_musculus/Gene/)). Arrows and number indicate genomic region contained in luciferase constructs.
